# Supplementary material
Source: Springer Nature journal article supplement (https://www.springermedizin.de/resource/supplementary/13045_2010_140_MOESM13_ESM.pdf/9660844)

Fig. 6B

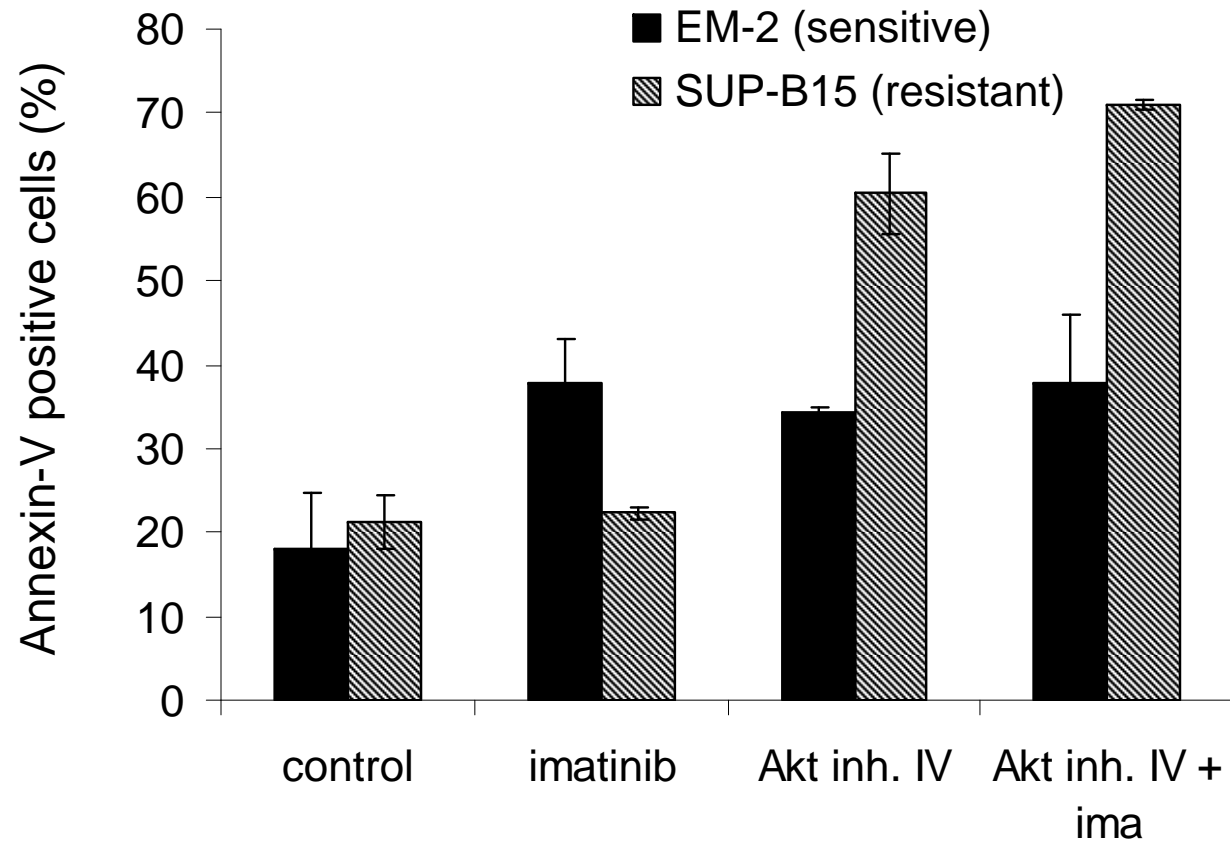

Supplement: MOESM13 [file 9660844]
